# Supplementary material for: Facile synthesis of Co3O4porous nanosheets/reduced graphene oxide composites and their excellent supercapacitor performance
Source: Royal Society of Chemistry journal article supplement (doi:10.1039/c4ra07136k), 2014-01-01
Supplement: c4ra07136k1.pdf [file c4ra07136k1.pdf]

## Supporting Information

# Facile synthesis of $\text{Co}_3\text{O}_4$ porous nanosheets/reduced graphene oxide composites and their excellent supercapacitor performance

Lianbo Ma,<sup>a</sup> Hu Zhou,<sup>b,c</sup> Xiaoping Shen,<sup>a\*</sup> Quanrun Chen,<sup>a</sup> Guoxing Zhu<sup>a</sup> and  
Zhenyuan Ji<sup>a</sup>

<sup>a</sup> *School of Chemistry and Chemical Engineering, Jiangsu University, Zhenjiang  
212013, P. R. China*

<sup>b</sup> *School of Material Science and Engineering, Jiangsu University, Zhenjiang 212003,  
P. R. China*

<sup>c</sup> *School of Material Science and Engineering, Jiangsu University of Science and  
Technology, Zhenjiang 212003, P. R. China*

---

\* *Corresponding author. Tel/Fax: +86-511-88791800.*

*E-mail address: [xiaopingshen@163.com](mailto:xiaopingshen@163.com) (Xiaoping Shen).*

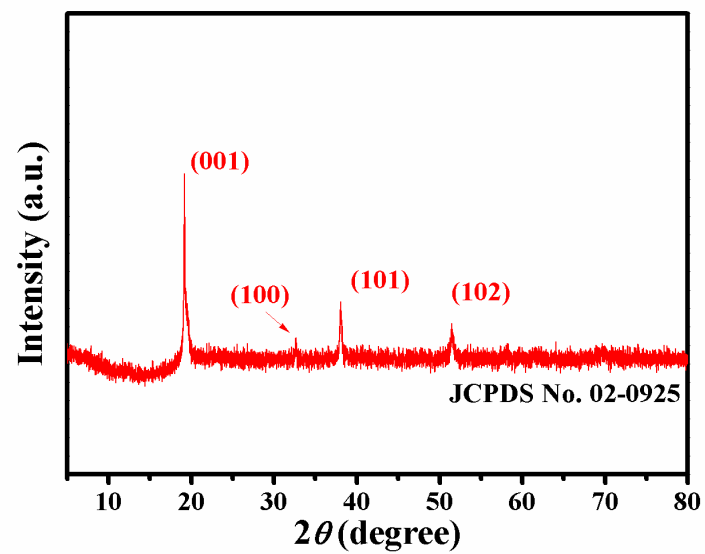

**Fig. S1.** XRD pattern of the as-prepared  $\text{Co(OH)}_2/\text{RGO}$  composite.

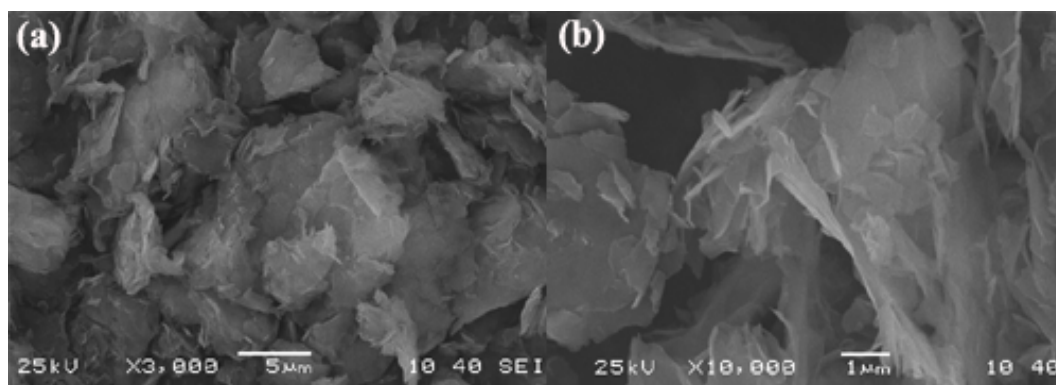

**Fig. S2.** (a,b) SEM images of  $\text{Co}_3\text{O}_4/\text{RGO-0.50}$  composite.

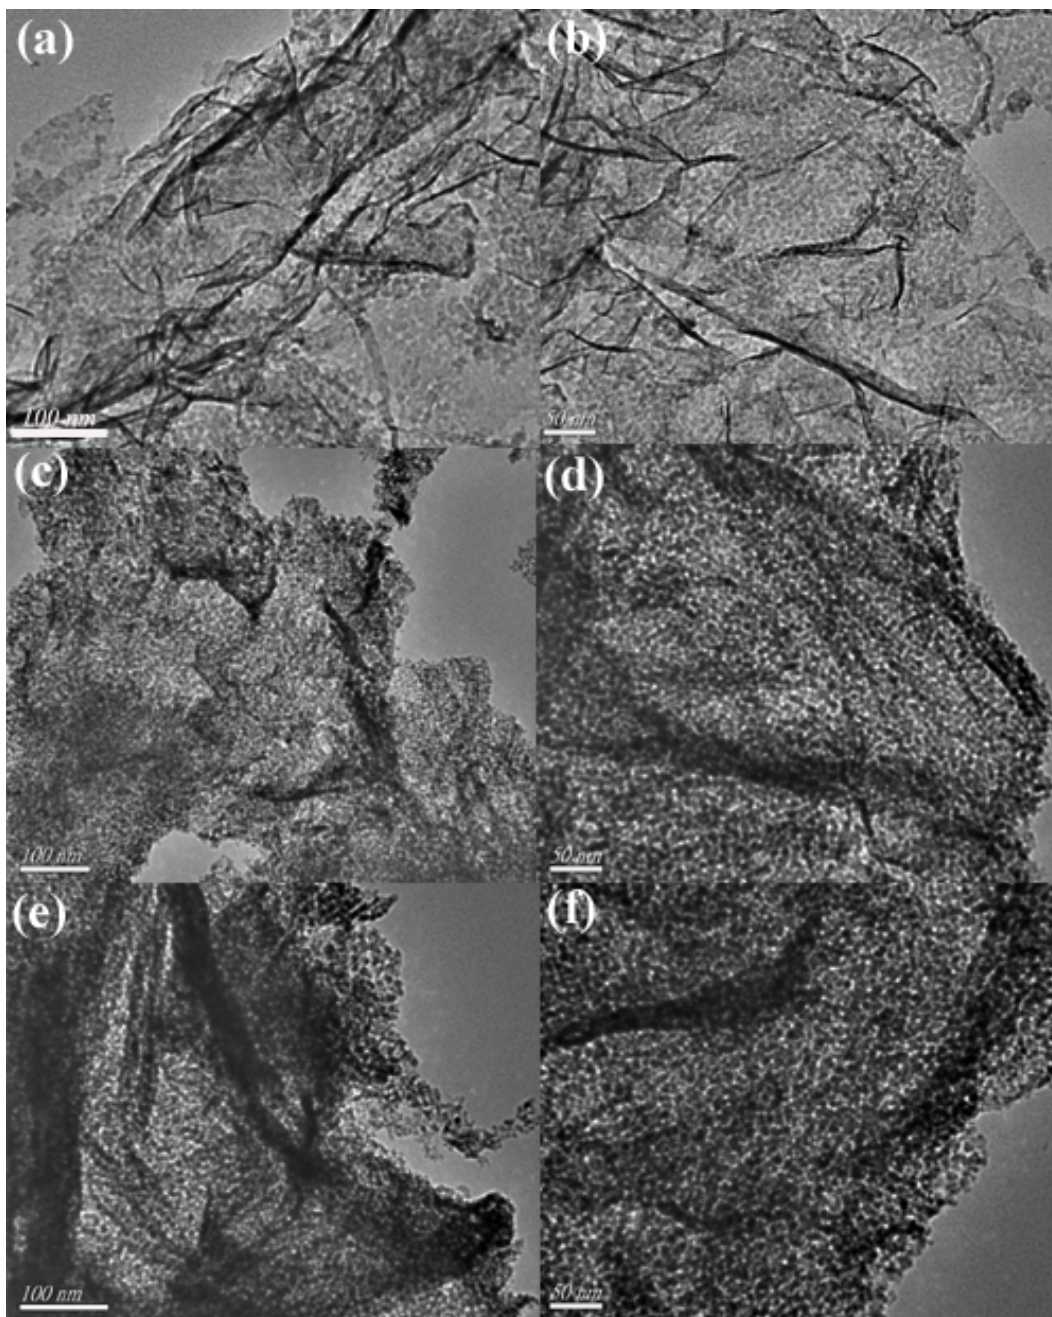

**Fig. S3.** TEM images of (a,b) Co<sub>3</sub>O<sub>4</sub>/RGO-0.25, (c,d) Co<sub>3</sub>O<sub>4</sub>/RGO-0.75 and (e,f) Co<sub>3</sub>O<sub>4</sub>/RGO-1.0 composites with different magnifications.

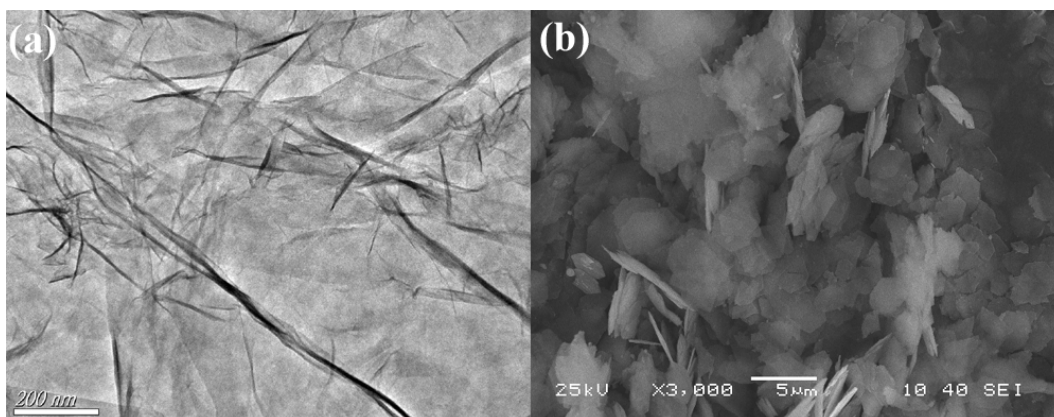

**Fig. S4.** (a) TEM image of  $\text{Co(OH)}_2/\text{RGO-0.50}$  composite before thermal annealing treatment and (b) SEM image of pure  $\text{Co(OH)}_2$  before thermal annealing treatment.

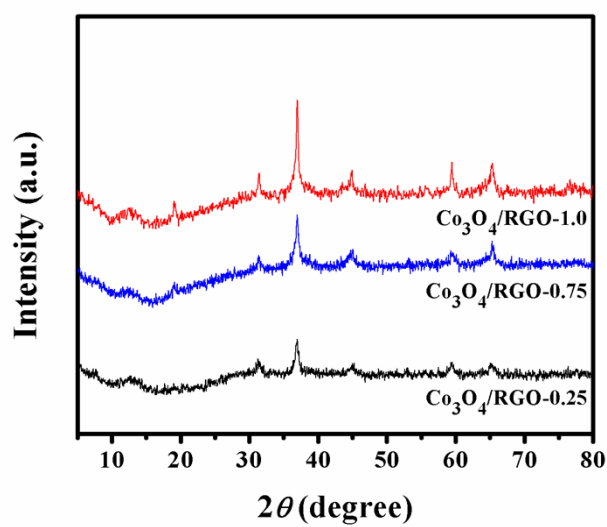

**Fig. S5.** XRD patterns of  $\text{Co}_3\text{O}_4/\text{RGO-0.25}$ ,  $\text{Co}_3\text{O}_4/\text{RGO-0.75}$  and  $\text{Co}_3\text{O}_4/\text{RGO-1.0}$  composites.

**Table S1.**  $\text{Co}_3\text{O}_4$  contents in  $\text{Co}_3\text{O}_4/\text{RGO}$  composites determined by ICP-OES.

| Samples                                 | $\text{Co}_3\text{O}_4$ content (wt%) |
|-----------------------------------------|---------------------------------------|
| $\text{Co}_3\text{O}_4/\text{RGO}-0.25$ | 75.2                                  |
| $\text{Co}_3\text{O}_4/\text{RGO}-0.50$ | 86.3                                  |
| $\text{Co}_3\text{O}_4/\text{RGO}-0.75$ | 90.6                                  |
| $\text{Co}_3\text{O}_4/\text{RGO}-1.0$  | 94.4                                  |
